# Supplementary material for: Point‐of‐care semen analysis of patients with infertility via smartphone and colorimetric paper‐based diagnostic device
Source: PubMed Central journal article supplement (PMC7823130; doi:10.1002/btm2.10176), 2020-08-18
Supplement: BTM2-6-e10176-s002.pdf [file BTM2-6-e10176-s002.pdf]

**Table SI. Colorimetric result of the semen sample interpreted by the smartphone and the corresponding total motile sperm count**

Category: Low TMSC

|                  |   |   |   |   |   |   |   |   |   |    |    |    |    |    |    |    |     |    |    |    |     |     |   |
|------------------|---|---|---|---|---|---|---|---|---|----|----|----|----|----|----|----|-----|----|----|----|-----|-----|---|
| Sample No.       | 1 | 2 | 3 | 4 | 5 | 6 | 7 | 8 | 9 | 10 | 11 | 12 | 13 | 14 | 15 | 16 | 17  | 18 | 19 | 20 | 21  | 22  |   |
| Test strip color |   |   |   |   |   |   |   |   |   |    |    |    |    |    |    |    |     |    |    |    |     |     |   |
| TMSC             | 0 | 0 | 0 | 0 | 1 | 0 | 0 | 0 | 0 | 0  | 0  | 0  | 0  | 0  | 0  | 0  | 3.2 | 15 | 14 | 13 | 8.7 | 3.3 |   |
| Result           | ✓ | ✓ | ✓ | ✓ | ✗ | ✓ | ✓ | ✓ | ✓ | ✓  | ✓  | ✓  | ✓  | ✓  | ✓  | ✓  | ✓   | ✓  | ✓  | ✓  | ✓   | ✓   | ✓ |

Category: Normal TMSC

|                  |    |    |     |    |     |    |    |    |     |    |     |     |    |    |    |    |    |    |    |     |  |  |
|------------------|----|----|-----|----|-----|----|----|----|-----|----|-----|-----|----|----|----|----|----|----|----|-----|--|--|
| Sample No.       | 23 | 24 | 25  | 26 | 27  | 28 | 29 | 30 | 31  | 32 | 33  | 34  | 35 | 36 | 37 | 38 | 39 | 40 | 41 | 42  |  |  |
| Test strip color |    |    |     |    |     |    |    |    |     |    |     |     |    |    |    |    |    |    |    |     |  |  |
| TMSC             | 67 | 56 | 248 | 86 | 775 | 67 | 46 | 92 | 122 | 86 | 266 | 140 | 96 | 74 | 41 | 36 | 80 | 58 | 27 | 194 |  |  |
| Result           | ✓  | ✗  | ✓   | ✓  | ✓   | ✓  | ✓  | ✓  | ✗   | ✓  | ✗   | ✗   | ✗  | ✗  | ✓  | ✓  | ✓  | ✓  | ✗  | ✓   |  |  |

TMSC: total motile sperm count

\*All the sample colors are changed to the gray scale and subtracted by the blank value
